# Supplementary material for: Versatile, cell and chip friendly method to gel alginate in microfluidic devices
Source: Royal Society of Chemistry journal article supplement (doi:10.1039/c6lc00769d), 2016-01-01
Supplement: c6lc00769d1.pdf [file c6lc00769d1.pdf]

## Versatile, cell and chip friendly method to gel alginate in microfluidic devices

Armend G. Håti<sup>a†</sup>, David C. Bassett<sup>a†</sup>, Jonas M. Ribe<sup>a</sup>, Pawel Sikorski<sup>a</sup>, David A. Weitz<sup>b</sup>, Bjørn T. Stokke<sup>a</sup>

<sup>a</sup>Biophysics and Medical Technology, Dept. of Physics, NTNU, Norwegian University of Science and Technology, NO-7491 Trondheim, Norway.

<sup>b</sup>Department of Physics, School of Engineering and Applied Sciences (SEAS), Harvard University, Cambridge, Massachusetts 02138, USA

† These authors contributed equally to this work

### Electronic Supplementary Information

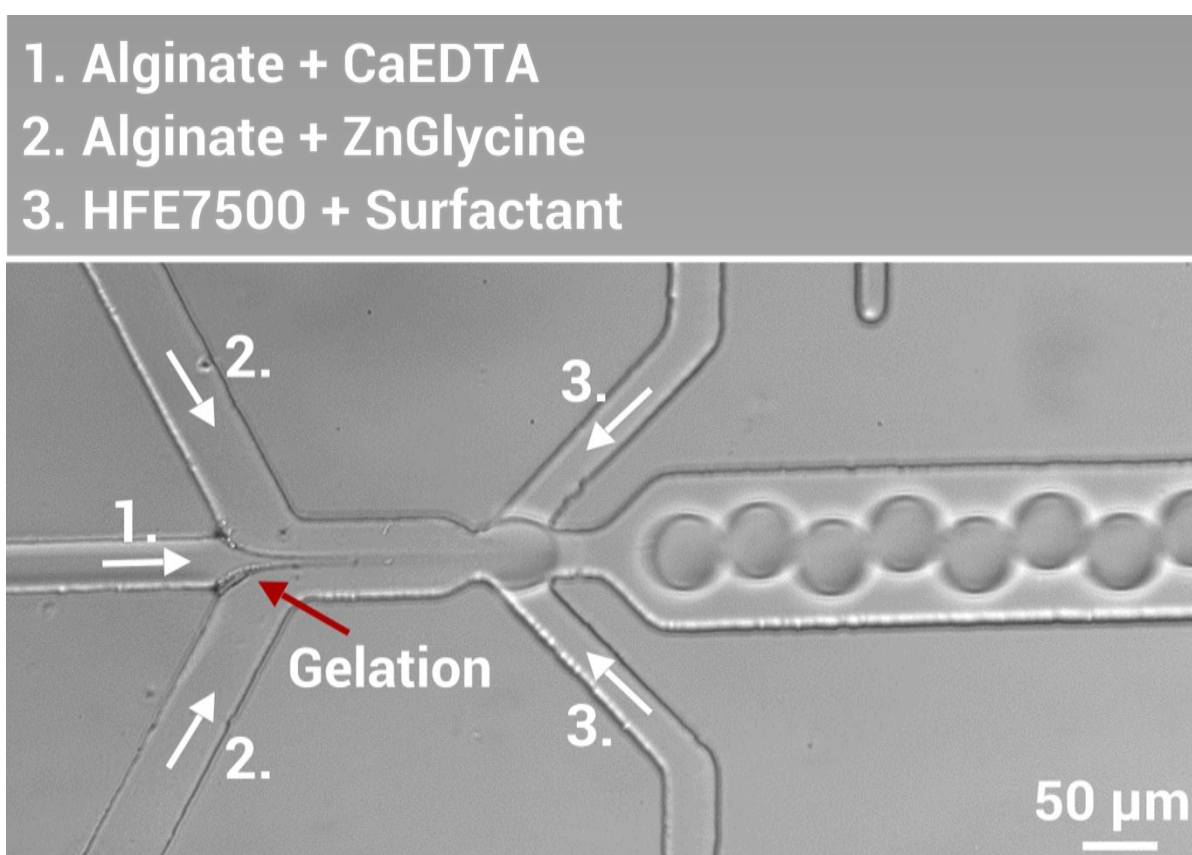

ESI Fig. 1: Micrographs of stagnation point gelling (red arrow) with CLEX in microchannels within a droplet device.

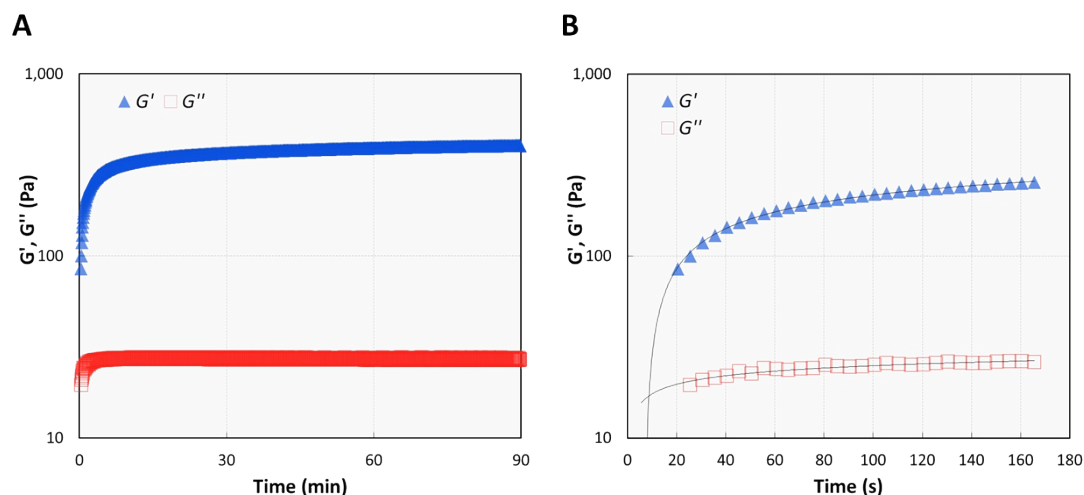

ESI Fig 2: A: Rheological characterisation of the change in mechanical properties with time for 0.6% alginate undergoing gelation via CLEX. B: Detail of initial data points shown in A, showing extrapolation used to calculate the point of gel formation.

### Monitoring of pH variations

A flow-cell was applied<sup>1</sup> to monitor the pH variations during the gelling upon mixing of the two precursor alginate phases containing the ion chelates CaEDTA and ZnEDDA. A pH sensitive fluorescent dye (N-(rhodamine 6G)-lactam-ethylenediamine (R6G-EDA)) was added to the alginate phase containing CaEDTA. The relationship between the sample pH and fluorescence intensity is described elsewhere<sup>1</sup>. A droplet of the CaEDTA-alginate containing the dye was placed between two cover slips following an injection of either ZnEDDA-alginate without dye or HFE7500 with 2 $\mu$ L/mL acetic acid without dye in-between the cover slips. The pH variations during the gelling of the CaEDTA containing alginate droplet was monitored over a duration of ~20 min and sampled every 5.2 seconds with a Leica SP5 confocal microscope.

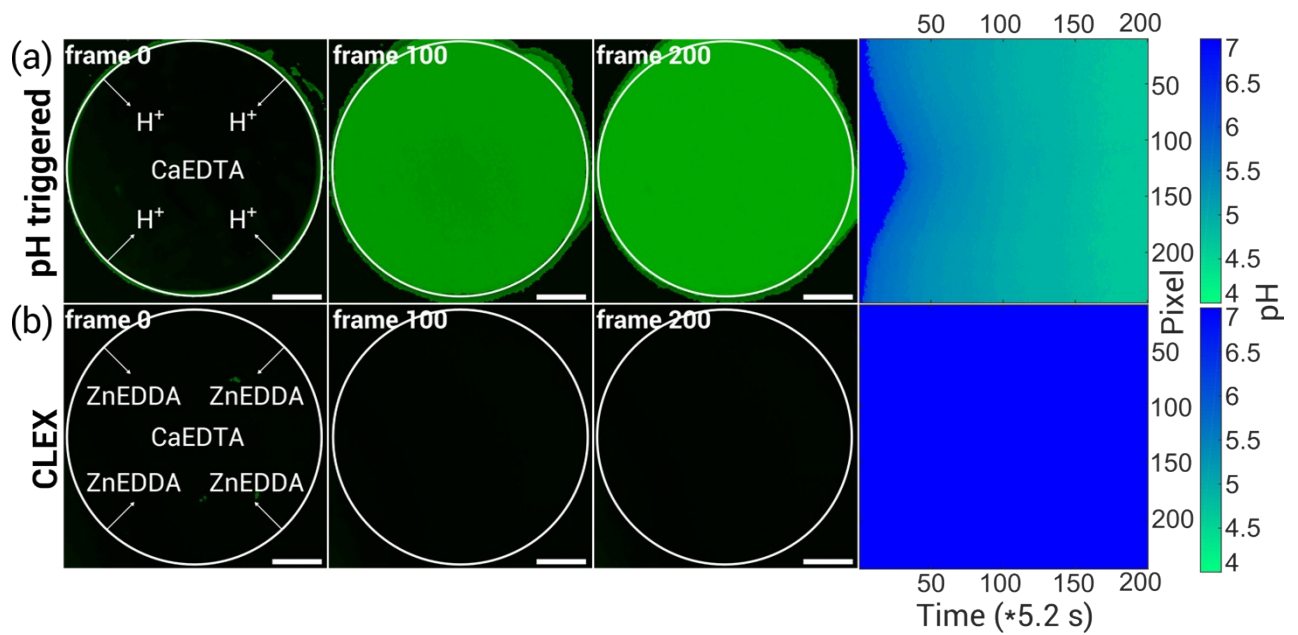

**ESI Fig. 3:** A comparison between the ionic exchange and pH triggered release mechanisms in terms of pH stability. A droplet of alginate containing CaEDTA was placed between two cover slips and gelled either by addition of (a) acetic acid or (b) ZnEDDA. The pH variations were monitored using a pH sensitive fluorescent dye (N-(rhodamine 6G)-lactam-ethylenediamine (R6G-EDA)) where increasing intensity relates to decreasing pH. Each frame was recorded with a time difference of 5.2 second. Scale bars: 100 $\mu$ m.

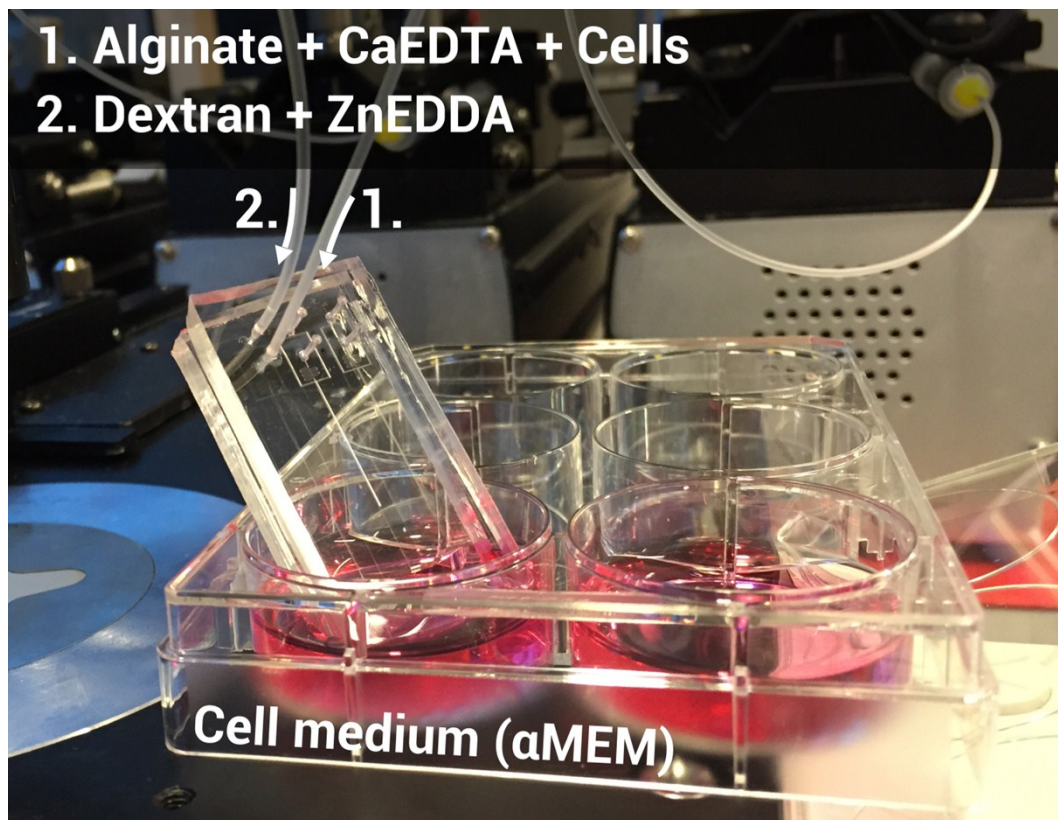

**ESI Fig. 4:** Image of the collection procedure of alginate microfibers directly from a 3D microfluidic PDMS device, without intermediate rinsing steps.

## ESI References

1. S. Bjørnøy, S. Mandaric, D. Bassett, A. Åslund, S. Ucar, J. Andreassen, B. Strand and P. Sikorski, *Acta Biomaterialia*, 2016.
